# Supplementary material for: MicroRNA profiling of paediatric AML with FLT-ITD or MLL-rearrangements: Expression signatures and in vitro modulation of miR-221-3p and miR-222-3p with BRD4/HATs inhibitors
Source: PubMed Central journal article supplement — Oncol Rep. 2022 Oct 31;48(6):221. doi: 10.3892/or.2022.8436 (PMC9647495; doi:10.3892/or.2022.8436), 2022-10-31
Supplement: Supplementary_Data1.pdf [file Supplementary_Data1.pdf]

Figure S1. Annexin V apoptosis plots after curcumin and JQ1 treatment. Representative flow cytometry plots of Annexin V apoptosis test for each cell lines included in the present study.

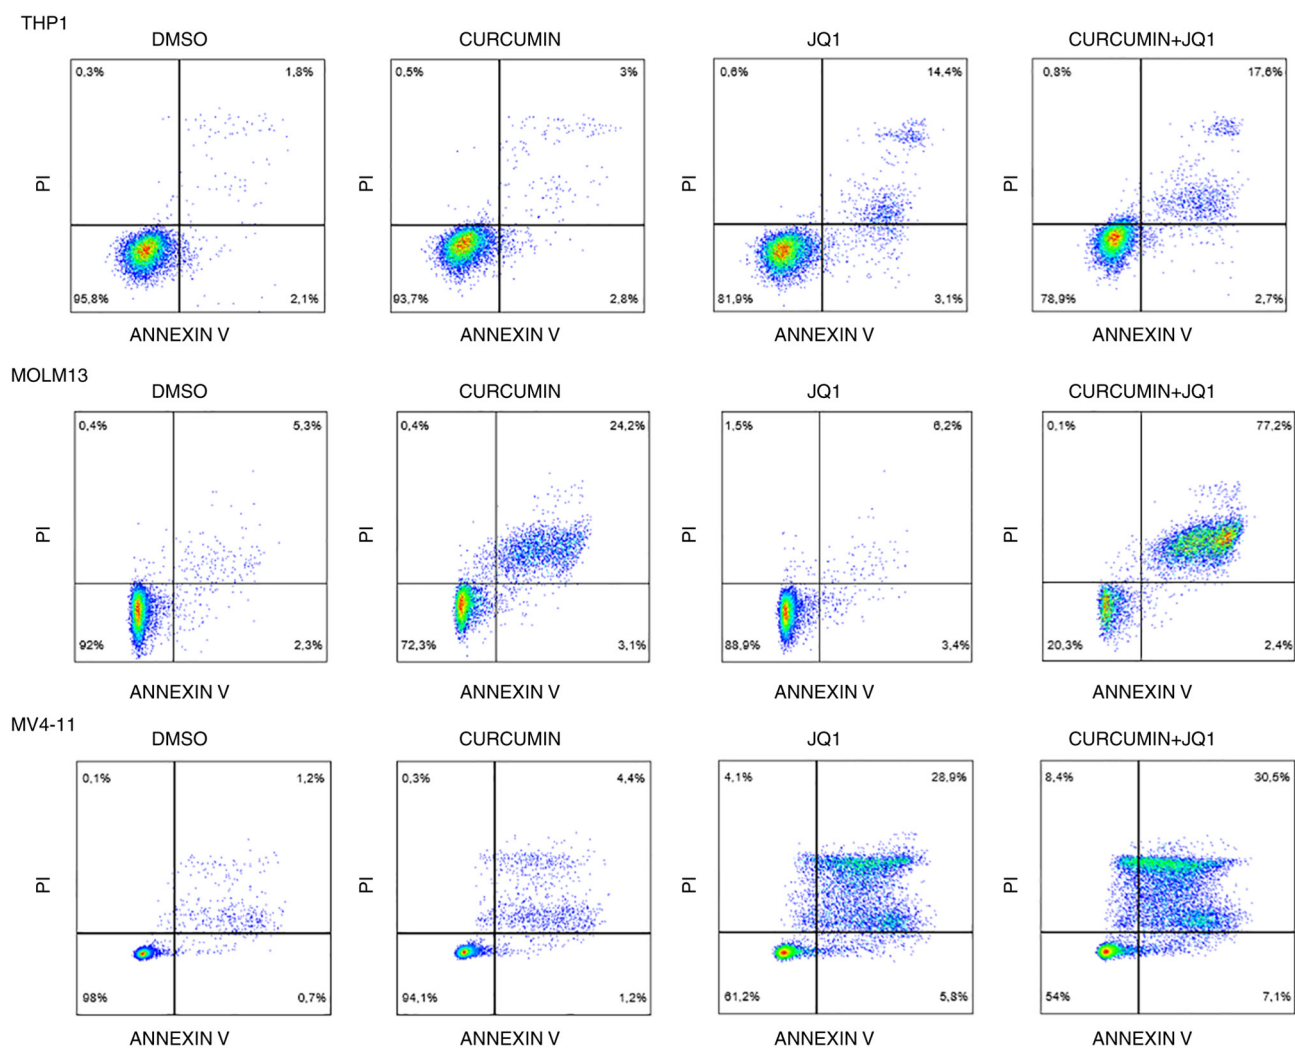

Figure S2. Purity of primary CD34<sup>+</sup> cells purity. Representative flow cytometric plot of CD34<sup>+</sup> cells selection.

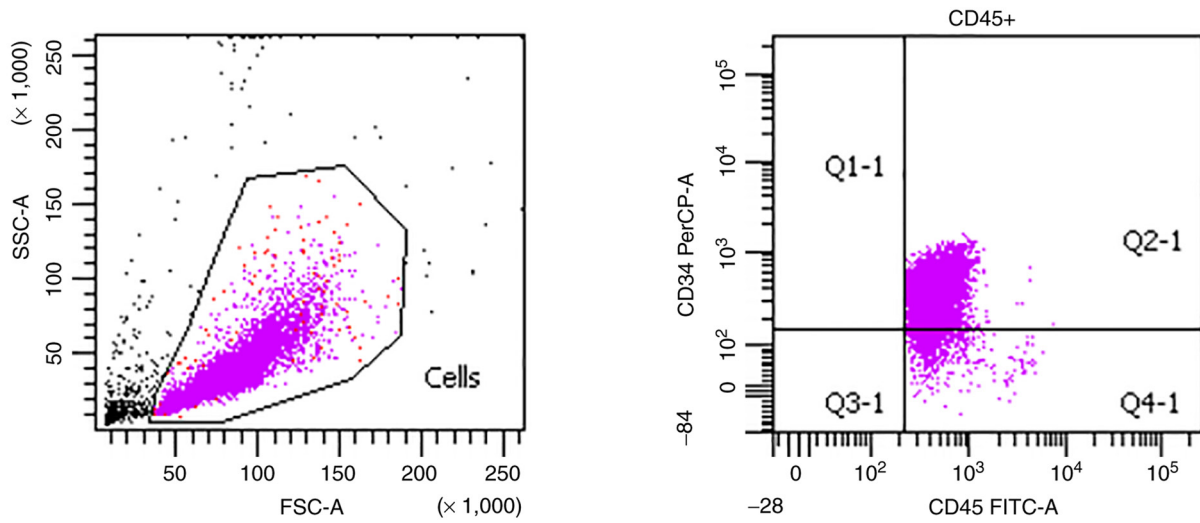

| Population   | #Events | %Parent | %Total |
|--------------|---------|---------|--------|
| ■ All Events | 10,549  | ####    | 100.0  |
| ■ Cells      | 10,000  | 94.8    | 94.8   |
| ☒ Q1         | 1       | 0.0     | 0.0    |
| ☒ Q2         | 142     | 1.4     | 1.3    |
| ☒ Q3         | 464     | 4.6     | 4.4    |
| ■ CD45+      | 9,393   | 93.9    | 89.0   |
| ☒ Q1-1       | 0       | 0.0     | 0.0    |
| ☒ Q2-1       | 8,396   | 89.4    | 79.6   |
| ☒ Q3-1       | 0       | 0.0     | 0.0    |
| ☒ Q4-1       | 997     | 10.6    | 9.5    |
