# Supplementary material for: MicroRNA profiling of paediatric AML with FLT-ITD or MLL-rearrangements: Expression signatures and in vitro modulation of miR-221-3p and miR-222-3p with BRD4/HATs inhibitors
Source: PubMed Central journal article supplement — Oncol Rep. 2022 Oct 31;48(6):221. doi: 10.3892/or.2022.8436 (PMC9647495; doi:10.3892/or.2022.8436), 2022-10-31
Supplement: Supplementary_Data2.pdf [file Supplementary_Data2.pdf]

Table SI. Identities of patients (Subsets) and characteristics.

| Patient ID (Subset)             | Sex    | Molecular analysis | Relapse ID (Subset)             |
|---------------------------------|--------|--------------------|---------------------------------|
| AML 00541 (REL-D <sup>a</sup> ) | Male   | t(9;11)            | AML 01140 (REL-R <sup>b</sup> ) |
| AML 07612 (REL-D)               | Male   | t(10;11)           | AML 09011 (REL-R)               |
| AML 07916 (REL-D)               | Male   | FLT3-ITD           | AML 08011 (REL-R)               |
| AML 08151 (REL-D)               | Male   | FLT3-ITD           | AML 08759 (REL-R)               |
| AML 09211 (REL-D)               | Male   | t(9;11)            | AML 10584 (REL-R)               |
| AML 10290 (REL-D)               | Female | FLT3-ITD           | AML 10577 (REL-R)               |
| AML 05184 (REL-D)               | Male   | FLT3-ITD           | AML 06080 (REL-R)               |
| AML 09598 (REL-D)               | Male   | FLT3-ITD           | AML 10121 (REL-R)               |
| AML 06995 (REL-D)               | Female | FLT3-ITD           | AML 07679 (REL-R)               |
| AML 08600 (REL-D)               | Female | t(10;11)           | AML 08973 (REL-R)               |
| AML 08640 (REL-D)               | Female | t(10;11)           | AML 11086 (REL-R)               |
| AML 08971 (REL-D)               | Female | FLT3-ITD           | AML 09424 (REL-R)               |
| AML 09468 (REL-D)               | Male   | FLT3-ITD           | AML 09609 (REL-R)               |
| AML 0101 (NREL <sup>c</sup> )   | Male   | t(9;11)            | -                               |
| AML 0202 (NREL)                 | Female | t(10;11)           | -                               |
| AML 0303 (NREL)                 | Male   | t(10;11)           | -                               |
| AML 0505 (NREL)                 | Male   | FLT3-ITD           | -                               |
| AML 0606 (NREL)                 | Male   | t(9;11)            | -                               |
| AML 0707 (NREL)                 | Female | FLT3-ITD           | -                               |
| AML 0808 (NREL)                 | Female | t(9;11)            | -                               |
| AML 0909 (NREL)                 | Male   | FLT3-ITD           | -                               |
| AML 1010 (NREL)                 | Male   | t(9;11)            | -                               |
| AML 1111 (NREL)                 | Male   | t(9;11)            | -                               |

<sup>a</sup>Patient at the time of diagnosis (REL-D); <sup>b</sup>relative samples at relapse (REL-R); <sup>c</sup>patients at diagnosis who never presented relapse (NREL); AML, acute myeloid leukemia.
